# Supplementary material for: Trends in benzodiazepine receptor agonists use and associated factors in the Belgian general older population: analysis of the Belgian health interview survey data
Source: PubMed Central journal article supplement — Ther Adv Psychopharmacol. 2021 May 25;11:20451253211011874. doi: 10.1177/20451253211011874 (PMC8161882; doi:10.1177/20451253211011874), 2021-05-25
Supplement: sj-pdf-1-tpp-10.1177_20451253211011874.pdf [file sj-pdf-1-tpp-10.1177_20451253211011874.pdf]

# **Supplementary material to the manuscript “Trends in Benzodiazepine Receptor Agonists use and Associated Factors in the Belgian General Older Population: Analysis of the Belgian Health Interview Survey Data”**

## **Therapeutic Advances in Psychopharmacology**

Catherine Péteïn<sup>1</sup>, Anne Spinewine<sup>1</sup>, Séverine Henrard<sup>1,2</sup>

<sup>1</sup> Clinical Pharmacy Research Group, Louvain Drug Research Institute, Université Catholique de Louvain, Brussels, Belgium; <sup>2</sup> Institute of Health and Society (IRSS), Université Catholique de Louvain, Brussels, Belgium

### **Corresponding author's email address:**

Catherine Péteïn

E-mail: [catherine.petein@uclouvain.be](mailto:catherine.petein@uclouvain.be)

**Supplementary table S1. Trends in benzodiazepines and z-drugs use (crude prevalence) in older adults in 2004, 2008 and 2013**

| Variable                                         | Year 2004 (N= 3594) |                               | Year 2008 (N=2917) |                               | Year 2013 (N=2048) |                               |
|--------------------------------------------------|---------------------|-------------------------------|--------------------|-------------------------------|--------------------|-------------------------------|
|                                                  | n                   | Crude prevalence (%) (95% CI) | n                  | Crude prevalence (%) (95% CI) | n                  | Crude prevalence (%) (95% CI) |
| <b>Total BZRA use</b>                            | 840                 | 23.4 (21.8; 25.0)             | 681                | 23.3 (21.6; 25.2)             | 363                | 17.7 (15.9; 19.6)             |
| <b>Number of BZRA taken</b>                      |                     |                               |                    |                               |                    |                               |
| 1                                                | 764                 | 21.3 (19.8; 22.8)             | 600                | 20.6 (19.0; 22.3)             | 326                | 15.9 (14.32; 17.7)            |
| ≥2                                               | 76                  | 2.1 (1.7; 2.6)                | 81                 | 2.8 (2.2; 3.5)                | 37                 | 1.8 (1.3; 2.5)                |
| <b>Total BZRA use by age group</b>               |                     |                               |                    |                               |                    |                               |
| 65-74 years                                      | 279                 | 17.7 (15.7; 19.9)             | 161                | 18.0 (15.4; 20.0)             | 148                | 14.2 (12.0; 16.7)             |
| 75-84 years                                      | 265                 | 24.6 (21.7; 27.7)             | 203                | 22.6 (19.6; 26.0)             | 154                | 20.6 (17.5; 24.2)             |
| 85 or more years                                 | 296                 | 31.5 (28.0; 35.3)             | 317                | 28.1 (25.1; 31.4)             | 61                 | 23.4 (17.9; 30.0)             |
| <b>Total BZRA use by gender</b>                  |                     |                               |                    |                               |                    |                               |
| Female                                           | 602                 | 27.8 (25.7; 30.1)             | 520                | 28.2 (25.8; 30.7)             | 237                | 20.6 (18.0; 23.4)             |
| Male                                             | 238                 | 16.6 (14.6; 18.9)             | 161                | 15.0 (12.8; 17.5)             | 126                | 14.1 (11.7; 16.7)             |
| <b>BZRA use by class</b>                         |                     |                               |                    |                               |                    |                               |
| Benzodiazepine use (N05BA or N05CD)              | 748                 | 20.8 (19.3; 22.4)             | 599                | 20.5 (18.9; 22.2)             | 302                | 14.7 (13.1; 16.5)             |
| Z-drugs use (N05CF)                              | 113                 | 3.1 (2.6; 3.8)                | 104                | 3.6 (2.9; 4.3)                | 64                 | 3.1 (2.4; 4.0)                |
| Sedative BZRA use (N05CD or N05CF)               | 362                 | 10.1 (9.1; 11.2)              | 304                | 10.4 (9.3; 11.7)              | 169                | 8.3 (7.1; 9.6)                |
| Anxiolytic BZRA use (N05BA)                      | 528                 | 14.7 (13.5; 16.0)             | 429                | 14.7 (13.3; 16.2)             | 221                | 10.8 (9.4; 12.3)              |
| <b>BZRA use at molecule level</b>                |                     |                               |                    |                               |                    |                               |
| Alprazolam                                       | 124                 | 3.5 (2.9; 4.1)                | 108                | 3.7 (3.0; 4.5)                | 72                 | 3.5 (2.8; 4.4)                |
| Bromazepam                                       | 97                  | 2.7 (2.2; 3.3)                | 85                 | 2.9 (2.3; 3.6)                | 35                 | 1.7 (1.2; 2.4)                |
| Lorazepam                                        | 224                 | 6.2 (5.4; 7.1)                | 190                | 6.5 (5.6; 7.5)                | 87                 | 4.2 (3.4; 5.2)                |
| Lormetazepam                                     | 169                 | 4.7 (4.0; 5.5)                | 138                | 4.7 (4.0; 5.6)                | 77                 | 3.8 (3.0; 4.7)                |
| Zolpidem                                         | 83                  | 2.3 (1.8; 2.9)                | 80                 | 2.7 (2.2; 3.4)                | 57                 | 2.8 (2.1; 3.6)                |
| Other                                            | 201                 | 5.6 (4.8; 6.4)                | 155                | 5.3 (4.5; 6.2)                | 68                 | 3.3 (2.6; 4.2)                |
| <b>Concomitant use of BZRA &amp; other drugs</b> |                     |                               |                    |                               |                    |                               |
| Antidepressants                                  | 223                 | 6.2 (5.4; 7.1)                | 182                | 6.2 (5.4; 7.2)                | 98                 | 4.8 (3.9; 5.8)                |
| Opioids                                          | 80                  | 2.2 (1.8; 2.8)                | 93                 | 3.2 (2.6; 3.9)                | 38                 | 1.9 (1.3; 2.5)                |

Abbreviations: BZRA, Benzodiazepine Receptor Agonists (ATC N05BA, N05CD and N05CF); 95%CI: 95% Confidence Interval

**Supplementary table S2. Factors associated with benzodiazepine and z-drugs use in older adults in 2013 in univariate and multivariable logistic regression (with detailed univariate analysis)**

| Variables                                    | Univariate model (N=1286) |         | Multivariable model (N=1225) |         |
|----------------------------------------------|---------------------------|---------|------------------------------|---------|
|                                              | OR (95%CI)                | p-value | OR (95%CI)                   | p-value |
| <b>Socio-demographic factors</b>             |                           |         |                              |         |
| Age                                          |                           |         |                              |         |
| 65-74 years                                  | 1.00                      |         |                              |         |
| 75-84 years                                  | 1.57 (1.15; 2.15)         | 0.005   |                              |         |
| 85 years or more                             | 1.80 (1.09; 2.90)         | 0.017   |                              |         |
| Female                                       | 1.68 (1.25; 2.28)         | <0.001  | 1.62 (1.14; 2.29)            | 0.007   |
| Region                                       |                           |         |                              |         |
| Flanders                                     | 1.00                      |         |                              |         |
| Brussels                                     | 0.73 (0.46; 1.12)         | 0.162   |                              |         |
| Wallonia                                     | 1.12 (0.81; 1.53)         | 0.498   |                              |         |
| Civil status                                 |                           |         |                              |         |
| Married or legally cohabiting                | 1.00                      |         |                              |         |
| Single (never married)                       | 0.99 (0.51; 1.79)         | 0.980   |                              |         |
| Widow(er) (not remarried)                    | 1.67 (1.20; 2.31)         | 0.002   |                              |         |
| Divorced (not remarried)                     | 1.25 (0.75; 2.00)         | 0.373   |                              |         |
| Educational level*                           |                           |         |                              |         |
| Higher                                       | 1.00                      |         |                              |         |
| Higher secondary                             | 2.05 (1.31; 3.26)         | 0.002   |                              |         |
| Lower secondary                              | 2.07 (1.30; 3.32)         | 0.002   |                              |         |
| No diploma or primary education              | 2.43 (1.57; 3.82)         | <0.001  |                              |         |
| Other                                        | 1.81 (0.27; 7.22)         | 0.457   |                              |         |
| Country of birth                             |                           |         |                              |         |
| Belgian                                      | 1.00                      |         |                              |         |
| Non-Belgian EU                               | 1.02 (0.55; 1.77)         | 0.941   |                              |         |
| Non-Belgian Non EU                           | 1.39 (0.55; 3.10)         | 0.446   |                              |         |
| Household income                             |                           |         |                              |         |
| Quintile 5 (highest quintile)                | 1.00                      |         |                              |         |
| Quintile 4                                   | 1.44 (0.80; 2.64)         | 0.233   |                              |         |
| Quintile 3                                   | 2.36 (1.39; 4.14)         | 0.002   |                              |         |
| Quintile 2                                   | 2.05 (1.22; 3.57)         | 0.008   |                              |         |
| Quintile 1 (lowest quintile)                 | 1.41 (0.78; 2.62)         | 0.261   |                              |         |
| Missing data (n=141)                         | 1.53 (0.80; 2.93)         | 0.193   |                              |         |
| <b>Geriatric factors</b>                     |                           |         |                              |         |
| Number of chronic conditions <sup>a</sup>    |                           |         |                              |         |
| 0 to 1                                       | 1.00                      |         |                              |         |
| 2 to 5                                       | 2.03 (1.47; 2.81)         | <0.001  |                              |         |
| 6 or more                                    | 3.82 (2.20; 6.52)         | <0.001  |                              |         |
| Low Body Mass Index (<21 kg/m <sup>2</sup> ) | 1.64 (0.98; 2.64)         | 0.051   | 2.02 (1.13; 3.50)            | 0.015   |
| Urinary incontinence                         | 1.82 (1.16; 2.77)         | 0.007   |                              |         |

|                                                                |                   |        |                   |        |
|----------------------------------------------------------------|-------------------|--------|-------------------|--------|
| Osteoporosis in the past 12 months <sup>a</sup>                | 1.80 (1.19; 2.67) | 0.004  |                   |        |
| Fall in the past 12 months                                     | 2.48 (1.77; 3.46) | <0.001 | 1.52 (1.02; 2.26) | 0.037  |
| Broken hip in the past 12 months                               | 1.14 (0.26; 3.57) | 0.840  |                   |        |
| Parkinson's disease in the past 12 months                      | 2.14 (0.75; 5.41) | 0.123  |                   |        |
| Handicap in mobility                                           |                   |        |                   |        |
| None                                                           | 1.00              |        |                   |        |
| Limited to house or garden                                     | 3.64 (2.22; 5.88) | <0.001 |                   |        |
| Limited to a seat                                              | 2.65 (1.30; 5.11) | 0.005  |                   |        |
| Limited to a bed                                               | 0.71 (0.04; 3.91) | 0.750  |                   |        |
| Handicap in performing daily activities <sup>b</sup>           |                   |        |                   |        |
| No restrictions                                                | 1.00              |        |                   |        |
| Moderate restrictions                                          | 2.64 (1.78; 3.87) | <0.001 |                   |        |
| Severe restrictions                                            | 2.57 (1.66; 3.91) | <0.001 |                   |        |
| Handicap in performing household activities <sup>c</sup>       |                   |        |                   |        |
| No restrictions                                                | 1.00              |        |                   |        |
| Moderate restrictions                                          | 1.64 (1.01; 2.59) | 0.039  |                   |        |
| Severe restrictions                                            | 3.36 (2.44; 4.64) | <0.001 |                   |        |
| <b>Comorbidities</b>                                           |                   |        |                   |        |
| Low back disorder in the past 12 months                        | 1.99 (1.47; 2.68) | <0.001 |                   |        |
| Osteoarthritis in the past 12 months <sup>a</sup>              | 2.13 (1.59; 2.87) | <0.001 |                   |        |
| Diabetes in the past 12 months                                 | 1.52 (1.01; 2.24) | 0.038  |                   |        |
| Myocardial infarction in the past 12 months                    | 2.00 (0.82; 4.46) | 0.101  |                   |        |
| Coronary heart disease (angina pectoris) in the past 12 months | 1.16 (0.50; 2.43) | 0.704  |                   |        |
| High blood pressure (hypertension) in the past 12 months       | 1.15 (0.85; 1.56) | 0.349  |                   |        |
| Pain (SF-36 Bodily pain scale score)                           |                   |        |                   |        |
| <30                                                            | 1.00              |        |                   |        |
| 30-49                                                          | 1.80 (1.22; 2.64) | 0.003  |                   |        |
| 50-74                                                          | 2.47 (1.64; 3.69) | <0.001 |                   |        |
| >75                                                            | 4.08 (2.58; 6.40) | <0.001 |                   |        |
| <b>(Mental) health indicators</b>                              |                   |        |                   |        |
| Reporting anxiety disorder                                     | 2.39 (1.54; 3.66) | <0.001 |                   |        |
| Reporting sleeping disorder                                    | 2.58 (1.91; 3.48) | <0.001 | 1.92 (1.35; 2.72) | <0.001 |
| Reporting depressive disorder <sup>a</sup>                     | 2.86 (2.04; 4.00) | <0.001 |                   |        |
| Mean GHQ-12 score                                              |                   |        |                   |        |
| <2                                                             | 1.00              |        |                   |        |
| [2-4[                                                          | 1.92 (1.25; 2.89) | 0.002  |                   |        |
| [4-7[                                                          | 3.22 (2.02; 5.06) | <0.001 |                   |        |
| >7                                                             | 2.85 (1.76; 4.51) | <0.001 |                   |        |
| Missing data (n=25)                                            | 2.19 (0.78; 5.30) | 0.102  |                   |        |
| Mean score of positive mental health (SF-36 Vitality Index)    |                   |        |                   |        |
| ≥50                                                            | 1.00              |        | 1.00              |        |
| <50                                                            | 3.23 (2.32; 4.50) | <0.001 | 1.73 (1.13; 2.69) | 0.011  |

|                                                                                                                 |                    |        |                    |        |
|-----------------------------------------------------------------------------------------------------------------|--------------------|--------|--------------------|--------|
| Missing data (n=163)                                                                                            | 1.46 (0.91; 2.28)  | 0.101  | 1.18 (0.68; 1.98)  | 0.552  |
| EQ-5D-5L score                                                                                                  | 0.05 (0.02; 0.09)  | <0.001 | 0.35 (0.14; 0.84)  | 0.019  |
| <b>Social Health</b>                                                                                            |                    |        |                    |        |
| Appreciation of social contacts <sup>a</sup> : rather unsatisfied vs rather satisfied                           | 2.11 (1.34 ; 3.26) | <0.001 |                    |        |
| Frequency of social contacts <sup>a</sup> : < 1 a week                                                          | 1.28 (0.64;2.37)   | 0.465  |                    |        |
| Perceived quality of social support                                                                             |                    |        |                    |        |
| Strong/Intermediate support                                                                                     | 1.00               |        |                    |        |
| Poor support                                                                                                    | 1.59 (1.12; 2.22)  | 0.008  |                    |        |
| Missing data (n=28)                                                                                             | 1.50 (0.55; 3.55)  | 0.384  |                    |        |
| <b>Medication use</b>                                                                                           |                    |        |                    |        |
| Number of medication BZRA excluded                                                                              |                    |        |                    |        |
| 0-4                                                                                                             | 1.00               |        | 1.00               |        |
| 5-9 (polypharmacy)                                                                                              | 3.24 (2.36; 4.46)  | <0.001 | 2.51 (1.75; 3.60)  | <0.001 |
| ≥10 (severe polypharmacy)                                                                                       | 5.73 (2.98; 10.86) | <0.001 | 2.82 (1.30; 6.04)  | 0.008  |
| Opioid use                                                                                                      | 2.41 (1.25; 4.45)  | 0.006  |                    |        |
| Antipsychotic use                                                                                               | 2.88 (1.14 ; 6.82) | 0.018  |                    |        |
| Antidepressant use                                                                                              | 4.61 (3.10; 6.83)  | <0.001 |                    |        |
| SSRI use                                                                                                        | 3.96 (2.34; 6.64)  | <0.001 |                    |        |
| Trazodone use                                                                                                   | 7.01 (3.28; 15.37) | <0.001 | 4.05 (1.64; 10.21) | 0.003  |
| Tricyclic antidepressant or mirtazapine use                                                                     | 3.26 (1.34; 7.53)  | 0.006  |                    |        |
| Other antidepressants use (antidepressants except trazodone, SSRI and tricyclic antidepressants or mirtazapine) | 4.80 (2.20; 4.42)  | <0.001 | 2.91 (1.16; 7.39)  | 0.022  |
| <b>Healthcare services use</b>                                                                                  |                    |        |                    |        |
| Regular GP                                                                                                      | 1.71 (0.59; 7.22)  | 0.384  |                    |        |
| Number of contacts with GP in the past 2 months                                                                 |                    |        |                    |        |
| 0                                                                                                               | 1.00               |        | 1.00               |        |
| 1                                                                                                               | 2.39 (1.60; 3.64)  | <0.001 | 1.89 (1.22; 2.98)  | 0.005  |
| ≥2                                                                                                              | 4.69 (3.11; 7.22)  | <0.001 | 2.15 (1.33; 3.51)  | 0.002  |
| Inpatient hospitalization in the past 12 months                                                                 | 1.40 (0.96; 2.02)  | 0.075  |                    |        |
| Contact with emergency department in the past year                                                              | 1.63 (1.08; 2.41)  | 0.018  |                    |        |
| Visiting a psychologist or psychotherapist in the past 12 months                                                | 1.78 (0.57; 4.70)  | 0.275  |                    |        |

Abbreviations: BZRA, Benzodiazepines Receptors Agonists (ATC N05BA, N05CD and N05CF); 95%CI, 95% Confidence Interval; EQ-5D-5L, EuroQol 5 dimensions, 5 levels; EU, European Union; GHQ-12, General Health Questionnaire 12 items; GP, General Practitioner; OR, Odds Ratio; SSRI, Selective Serotonin Reuptake Inhibitors

<sup>a</sup> missing values: educational level (16); number of chronic conditions (5), osteoporosis in the past 12 months (4), reporting depressive disorder (2), osteoarthritis (1), appreciation of social support (21), EQ-5D-5L score (52), frequency of social contacts (22)

<sup>b</sup> Getting in and out a bed; getting in and out a seat; getting dressed/undressed; able to take a shower or a bath; eating/cutting food, able to use toilets

<sup>c</sup> Prepare meals, use the phone, able to shop, manage medications, do light housework, do occasionally heavy housework, take care of finance and everyday administrative tasks

**Supplementary table S3. Factors candidate for the final multivariable model<sup>a</sup>**

| <b>Socio-demographic factors</b>                                                                                                                                                                                                                                                                                                                                                                                                                                                               |
|------------------------------------------------------------------------------------------------------------------------------------------------------------------------------------------------------------------------------------------------------------------------------------------------------------------------------------------------------------------------------------------------------------------------------------------------------------------------------------------------|
| Age<br>Gender<br>Civil status<br>Educational level<br>Household income                                                                                                                                                                                                                                                                                                                                                                                                                         |
| <b>Geriatric factors</b>                                                                                                                                                                                                                                                                                                                                                                                                                                                                       |
| Multimorbidity<br>Urinary incontinence, problems in controlling the bladder in the past 12 months<br>Osteoporosis in the past 12 months<br>Fall in the past 12 months<br>Parkinson's disease in the past 12 months<br>Risk of underweight (Body Mass Index < 21 kg/m <sup>2</sup> )<br>Severity of the handicap in mobility<br>Severity of restrictions in performing daily activities<br>Severity of restrictions in performing household activities                                          |
| <b>Comorbidities</b>                                                                                                                                                                                                                                                                                                                                                                                                                                                                           |
| Low back disorder or other chronic back defect in the past 12 months<br>Osteoarthritis in the past 12 months<br>Diabetes in the past 12 months<br>Myocardial infarction in the past 12 months<br>Pain (MOS 36-item Short-Form Health Survey (SF-36) Bodily pain score)                                                                                                                                                                                                                         |
| <b>Mental health indicators and subjective health indicators</b>                                                                                                                                                                                                                                                                                                                                                                                                                               |
| Mean score to the General Health Questionnaire (GHQ-12)<br>Mean score to the Vitality Index (MOS 36-item Short-Form Health Survey (SF-36))<br>Reporting sleeping disorder (subscale of Symptoms Checklist-90-Revised questionnaire (SCL-90-R))<br>Reporting anxiety disorder (subscale of Symptoms Checklist-90-Revised questionnaire (SCL-90-R))<br>Reporting depressive disorder (subscale of Symptoms Checklist-90-Revised questionnaire (SCL-90-R))<br>EuroQol-5D-5L scale (EQ5D-5L) score |
| <b>Social health</b>                                                                                                                                                                                                                                                                                                                                                                                                                                                                           |
| Appreciation of social contacts<br>Perceived quality of social support (Oslo Social Support Scale)                                                                                                                                                                                                                                                                                                                                                                                             |
| <b>Medication use</b>                                                                                                                                                                                                                                                                                                                                                                                                                                                                          |
| Number of medications excluding BZRA<br>Opioid use<br>SSRI use<br>Tricyclic antidepressants or mirtazapine use<br>Trazodone use<br>Other antidepressant use (antidepressants except SSRI, trazodone and tricyclic antidepressant or mirtazapine)<br>Antipsychotic use                                                                                                                                                                                                                          |
| <b>Healthcare services use</b>                                                                                                                                                                                                                                                                                                                                                                                                                                                                 |
| Number of contacts with the GP in the past 2 months<br>Inpatient hospitalization in the past 12 months<br>Contact with emergency department in the past 12 months                                                                                                                                                                                                                                                                                                                              |
| Abbreviations: BZRA, Benzodiazepine Receptor Agonists (ATC N05BA, N05CD and N05CF); GP, General Practitioner; SSRI: Selective Serotonin Reuptake Inhibitors<br><sup>a</sup> Candidate variables included in the multivariable model before stepwise selection (= all variables with a p-value <0.15 in the univariate model)                                                                                                                                                                   |

**Supplementary table S4. Characteristics of the included and excluded observations**

| <b>Variable</b>                 | <b>Included<br/>N=1286<br/>n (%)</b> | <b>Excluded<br/>N=762<br/>n (%)</b> | <b>p-value <sup>a</sup></b> |
|---------------------------------|--------------------------------------|-------------------------------------|-----------------------------|
| <b>Age</b>                      |                                      |                                     | <0.001                      |
| 65-74 years                     | 115 (8.94)                           | 146 (19.16)                         |                             |
| 75-84 years                     | 732 (56.92)                          | 309 (40.55)                         |                             |
| 85 years or more                | 439 (34.14)                          | 307 (40.29)                         |                             |
| <b>Gender</b>                   |                                      |                                     | <0.001                      |
| Female                          | 683 (53.11)                          | 469 (61.55)                         |                             |
| Male                            | 603 (46.89)                          | 293 (38.45)                         |                             |
| <b>Civil status</b>             |                                      |                                     | 0.025                       |
| Single (not married)            | 90 (7.00)                            | 68 (8.92)                           |                             |
| Married or legally cohabiting   | 715 (55.60)                          | 399 (52.36)                         |                             |
| Widow(er) (not remarried)       | 344 (26.75)                          | 234 (30.71)                         |                             |
| Divorced (not remarried)        | 137 (10.65)                          | 61 (8.01)                           |                             |
| <b>Region</b>                   |                                      |                                     | <0.001                      |
| Flanders                        | 543 (42.22)                          | 208 (27.30)                         |                             |
| Brussels                        | 225 (17.50)                          | 208 (27.30)                         |                             |
| Wallonia                        | 518 (40.28)                          | 346 (45.41)                         |                             |
| <b>Education level</b>          |                                      |                                     | <0.001                      |
| No diploma or primary education | 330 (25.66)                          | 306 (40.16)                         |                             |
| Lower secondary                 | 274 (21.31)                          | 145 (19.03)                         |                             |
| Higher secondary                | 313 (24.34)                          | 156 (20.47)                         |                             |
| Higher                          | 341 (26.52)                          | 110 (14.44)                         |                             |
| Other                           | 12 (0.93)                            | 4 (0.52)                            |                             |
| Missing                         | 16 (1.24)                            | 41 (5.38)                           |                             |
| <b>Country of birth</b>         |                                      |                                     | <0.001                      |
| Belgian                         | 1218 (94.71)                         | 656 (86.09)                         |                             |
| Non Belgian EU                  | 59 (4.59)                            | 54 (7.09)                           |                             |
| Non Belgian non EU              | 9 (0.70)                             | 26 (3.41)                           |                             |
| Missing                         | 0 (0.00)                             | 26 (3.41)                           |                             |
| <b>Household income</b>         |                                      |                                     | <0.001                      |
| Quintile 1 (lowest income)      | 192 (14.93)                          | 154 (20.21)                         |                             |
| Quintile 2                      | 307 (23.87)                          | 170 (22.31)                         |                             |
| Quintile 3                      | 248 (19.28)                          | 97 (12.73)                          |                             |
| Quintile 4                      | 203 (15.79)                          | 95 (12.47)                          |                             |
| Quintile 5 (highest income)     | 195 (15.16)                          | 41 (5.38)                           |                             |
| Missing                         | 141 (10.96)                          | 205 (26.90)                         |                             |
| <b>BZRA use</b>                 |                                      |                                     | 0.211                       |
| Yes                             | 217 (16.87)                          | 146 (19.16)                         |                             |

Abbreviations: EU, European Union; BZRA, Benzodiazepines Receptors Agonists (ATC N05BA, N05CD and N05CF)

<sup>a</sup> Pearson chi-square test or Fisher exact test
